# Supplementary material
Source: PubMed Central journal article supplement (PMC5974434)
Supplement: MCB.00007-18_zmb999101769s2.pdf [file MCB.00007-18_zmb999101769s2.pdf]

## RBM4 modulates radial migration via alternative splicing of Dab1 during cortex development

Dhananjaya D<sup>a,b</sup>, Kuan-Yang Hung<sup>b</sup>, and Woan-Yuh Tarn<sup>a,b,\*</sup>

<sup>a</sup>Taiwan International Graduate Program in Molecular Medicine, National Yang-Ming University and Academia Sinica,

<sup>b</sup>Institute of Biomedical Sciences, Academia Sinica, Taipei, Taiwan

### Supplemental Table 1: The top 68 transcripts enriched in RBM4 immunoprecipitation (Excel file)

### Supplemental Table 2: Primers used for RT-PCR and construct

| RT-PCR                   |                                                                    |                                                                          |
|--------------------------|--------------------------------------------------------------------|--------------------------------------------------------------------------|
|                          | Forward                                                            | Reverse                                                                  |
| hGAPDH                   | CGGAGTCAACGGATTTGGTCGTATG                                          | AGCCTTCTCCATGGTGGTGAAGAC                                                 |
| mGAPDH                   | GTCGTGGAGTCTACTGGTGT                                               | TACTTGGCAGGTTTCTCCAG                                                     |
| U6                       | CTCGCTTCGGCAGCACA                                                  | AACGCTTCACGAATTTGCGT                                                     |
| mDab1(1)                 | CGGCTGAACCTGTTATCCTG                                               | CTTCTTCTTTTGGCTGGTG                                                      |
| mDab1 (2)                | AACCAGCGCCAAGAAAGACT                                               | GTGCGCCAGCAACAACAC                                                       |
| mDab1-9bc                | GTTCCCACCAGCCAAAAGAAG                                              | GGAAGCGTCTGGGACGAC                                                       |
| RBM4a                    | ATGGTGAAGCTGTTCAATTGG                                              | CTGCTGCTGCTGCAGCTCCTGAAGG                                                |
| RBM4b                    | ATGGTGAAGCTGTTCAATTGG                                              | CGGGAAGCACAGCCGCATTC                                                     |
| Atn1                     | TGTCTTATGCTGAGCGGTTG                                               | GTGGATAGCATCCTGCTGGT                                                     |
| Csk                      | TGAGCAAGACCTTCCCTTCT                                               | GCCTGTCTCTGGTGGGTAAA                                                     |
| Map2                     | GGACATCAGCCTCACTCACAGA                                             | GCAGCATGTTCAAAGTCTTCACC                                                  |
| T7/BGH                   | TAATACGACTCACTATAGGG                                               | TAGAAGGCACAGTCGAGG                                                       |
| Dab1 expression vectors  |                                                                    |                                                                          |
| Dab1                     | AGCTGAATTCATGTCAACTGAGACA<br>GAACTTCAAG                            | AGCTCCGCGGCTAGCTACCGTCTTGTG<br>GACTTATAT                                 |
| Dab1Δ78                  | GTTCCCACCAGCCAAAAGAAGGAAG<br>GTGTT                                 | CTGGTACACAGCTTGTTCACACTGCTT<br>ATC                                       |
| Dab1 mNES                | GCTGAACCTGTTATCGCggacGCgagaga<br>tGCcGCCcaaGCcATCTATG              | TGGTAGAAGTCACAGGGGTcGCgttcGcTt<br>gggagGCgtcGGCGTCATC                    |
| Dab1 minigene constructs |                                                                    |                                                                          |
| Exon 6-7                 | AGCTAAGCTTTCCTTGTGTTTCATAGC<br>CTCA                                | AGCTCTCGAGCCGTTATCCATCTTGTC<br>TCT                                       |
| Exon 8                   | AGCTCTCGAGAAAGCAAGGGGACC<br>GTAG                                   | AGCTGTGACCCGAAACTGTAAGCCA<br>GACC                                        |
| Exon 9                   | AGCTGTGACGAAAGGCTCAAGAG<br>CAGGA                                   | AGCTGGTACCCATGTACTATAAAGCTG<br>TGG                                       |
| EMSA probe constructs    |                                                                    |                                                                          |
| Intron 6                 | GCTGGCTCTCTACTGTGCTG                                               | CCTCTTCCAAAATGGTCTATCC                                                   |
| Intron 7                 | CTGTGATTTGCATCTAAATTGG                                             | CAAACACAATGTACTATTGCAGGA                                                 |
| Intron 8                 | CTGAGAGGTTCAAGGCATCG                                               | AGACATGGAACCTTCAGGAA                                                     |
| shRNA constructs         |                                                                    |                                                                          |
|                          | Sense strand                                                       | Anti-sense strand                                                        |
| shRBM4                   | CCCGGGCCAGTCATCGAATGTGACA<br>TCTCGAGATGTCACATTCGATGACTG<br>GGTTTTT | TCGAGAAAAACCCAGTCATCGAATGTG<br>ACATCTCGAGATGTCACATTCGATGAC<br>TGGGCCCGGG |
